# Supplementary material for: Risk-Targeted Behavioral Activation for the Management of Work-Disability Associated with Co-Morbid Pain and Depression: A Feasibility Study
Source: Research Square preprint supplement (doi:10.21203/rs.3.rs-1211828/v1), 2022-01-03
Supplement: Supplementary file 1 [file 627974ff079136c3efb899e2.docx]

STROBE Checklist

Risk-Targeted Behavioral Activation for the Management of Work-Disability

Associated with Co-Morbid Pain and Depression: A Feasibility Study

Item Page

1. Title and Abstract 1, 3
2. Background/Rational 4, 5
3. Objectives 5
4. Study Design 5, 10
5. Setting 7, 9
6. Participants 6
7. Variables 8, 9
8. Data Sources 8, 9
9. Bias 18, 19
10. Study Size 6
11. Quantitative Variables 10
12. Statistical Methods 10
13. Results: Participants 10, 11
14. Descriptive Data 10, 11
15. Outcome Data 12, 13
16. Main Results 12, 13
17. Other Analyses 13
18. Discussion: Key Results 14
19. Discussion: Limitations 18, 19
20. Interpretation 15, 16
21. Generalizability 18, 19
22. Funding 2
